# Supplementary material
Source: PubMed Central journal article supplement (PMC2651339)
Supplement: 0813320106_0813320106SI.pdf [file 0813320106_0813320106SI.pdf]

# Supporting Information

Fogg et al. 10.1073/pnas.0813320106

Table S1. HLA Class I type of healthy donors and patients with EBV-associated Nasopharyngeal Carcinoma, and clinical characteristics of NPC patients

| Donor | A alleles                  | B alleles               | C alleles   | Extent of disease | Last chemo-therapy <sup>a</sup> | Last radio-therapy <sup>a</sup> |
|-------|----------------------------|-------------------------|-------------|-------------------|---------------------------------|---------------------------------|
| A     | A*02 A*24                  | B*27 B*07               | Cw*11 Cw*07 |                   |                                 |                                 |
| B     | A*02 A*24                  | B*08 B*46               | Cw*01 Cw*07 |                   |                                 |                                 |
| C     | A*11 A*33                  | B*27 B*58               | Cw*03 Cw*12 |                   |                                 |                                 |
| E     | A*11 A*31                  | B*40 B*51               | Cw*14 Cw*15 |                   |                                 |                                 |
| F     | A*02 A*66                  | B*3503 B*38             | Cw*04 Cw*12 |                   |                                 |                                 |
| G     | A*01 A*03                  | B*07 B*57               | Cw*06 Cw*07 |                   |                                 |                                 |
| H     | A*01 A*11                  | B*08 B*44               | Cw*05 Cw*07 |                   |                                 |                                 |
| I     | A*0206 <sup>b</sup> A*0206 | B*54 B*5901             | Cw*01 Cw*01 |                   |                                 |                                 |
| J     | A*02 A*24                  | B*40 B*50x <sup>c</sup> | Cw*06 Cw*07 |                   |                                 |                                 |
| K     | A*02 A*30                  | B*18 B*3503             | Cw*04 Cw*05 |                   |                                 |                                 |
| L     | A*11 A*29                  | B*3501 B*44             | Cw*04 Cw*16 |                   |                                 |                                 |
| M     | A*29 A*6802                | B*53 B*57               | Cw*04 Cw*07 |                   |                                 |                                 |
| N     | A*02 A*02                  | B*3501 B*50x            | Cw*04 Cw*06 |                   |                                 |                                 |
| NPC1  | A*02 A*23                  | B*41 B*44               | Cw*04 Cw*17 | DM <sup>d</sup>   | 11                              | 11                              |
| NPC2  | A*02 A*03                  | B*07 B*27               | Cw*01 Cw*07 | LR <sup>e</sup>   | na <sup>f</sup>                 | na                              |
| NPC4  | A*02 A*02                  | B*40 B*51               | Cw*03 Cw*15 | LR                | 10                              | 10                              |
| NPC5  | A*01 A*02                  | B*44 B*15               | Cw*04 Cw*07 | LR                | na                              | na                              |
| NPC6  | A*01 A*02                  | B*50 B*57               | Cw*06 Cw*06 | LR                | 23                              | 23                              |
| NPC7  | A*33 A*33                  | B*40 B*15x              | Cw*07 Cw*08 | LR                | 0.25                            | 72                              |
| NPC8  | A*03 A*66x                 | B*3503 B*41             | Cw*04 Cw*17 | LR                | na                              | na                              |
| NPC9  | A*02 A*02                  | B*3508 B*41             | Cw*04 Cw*17 | LR                | 21                              | 23                              |
| NPC11 | A*03 A*24                  | B*41 B*45               | Cw*16 Cw*17 | LR                | 3                               | 3                               |
| NPC12 | A*02 A*29                  | B*39 B*58               | Cw*07 Cw*12 | LR                | 16                              | 16                              |
| NPC13 | A*02 A*02                  | B*46 B*51               | Cw*01 Cw*15 | LR                | 60                              | 60                              |
| NPC14 | A*02 A*24                  | B*46B*15x               | Cw*01 Cw*08 | LR                | 7                               | 7                               |
| NPC15 | A*02 A*02                  | B*51 B*57               | Cw*06 Cw*14 | LR                | 12                              | 12                              |
| NPC17 | A*02 A*02                  | B*40 B*46               | Cw*01 Cw*07 | LR                | 108                             | 108                             |
| NPC18 | A*01 A*01                  | B*3508 B*44             | Cw*04 Cw*04 | LR                | na                              | na                              |
| NPC19 | A*11 A*11                  | B*3503 B*46             | Cw*01 Cw*12 | LR                | na                              | na                              |
| NPC20 | A*24 A*33                  | B*13 B*58               | Cw*03 Cw*03 | LR                | na                              | na                              |
| NPC21 | A*24 A*24                  | B*46 B*51               | Cw*01 Cw*15 | DM                | 7                               | 14                              |
| NPC26 | A*02 A*23                  | B*07 B*39               | Cw*07 Cw*07 | LR                | 65                              | 65                              |
| NPC29 | A*02 A*02                  | B*38 B*15x              | Cw*07 Cw*12 | LR                | na                              | na                              |
| NPC30 | A*24 A*68                  | B*3502 B*39             | Cw*04 Cw*07 | DM                | na                              | na                              |
| NPC34 | A*02 A*33                  | B*46 B*58               | Cw*01 Cw*03 | DM                | na                              | na                              |

<sup>a</sup>Months after last chemo- or radiotherapy when research blood was drawn.

<sup>b</sup>This donor was typed for HLA A02 at a higher resolution.

<sup>c</sup>Low-resolution typing identified alleles as A\*6601 or 04, B\*5001 or 04, and B\*1502, 21, 44, or 88.

<sup>d</sup>Distant metastases.

<sup>e</sup>Locoregional disease.

<sup>f</sup>Not applicable, research blood drawn prior to any chemo- or radiotherapy
